is number thirty-seven in its American Exploration and Travel Series. All libraries should have this set on their shelves.

University of Arizona

MARIO RODRÍGUEZ

*Historiografía de Cuba.* By JOSÉ MANUEL PÉREZ CABRERA. México, 1962. Instituto Panamericano de Geografía e Historia. Comisión de Historia. Index. Pp. 394. Paper

La serie Historiografía, de la Comisión de Historia del Instituto Panamericano de Geografía e Historia, con sede en México, ha publicado hasta la fecha los estudios correspondientes a Haití, British West Indies, Ecuador, Brasil (siglo XVI), Paraguay, Brasil (siglo XVII) y Cuba, el séptimo tomo, correspondiéndole este último al historiador cubano, José Manuel Pérez Cabrera. Dentro de las Publicaciones de la Comisión, le corresponde el No. 106; así como el 262, de la serie general de Publicaciones del Instituto.

La obra está dividida en cuatro Libros: 1, Antecedentes, siglos XV a XVIII, subdividido en dos capítulos, La crónica de Indias y Libros de viajes e ilustración; 2, Los orígenes vernaculares, con cuatro capítulos, La historia, floración tardía de nuestra literatura colonial, Alusiones tradicionales y primeros ensayos, De Morell a Urrutia e Historia y crítica; 3, Primeras manifestaciones del siglo XIX, con un solo capítulo, De 1801 a 1841; y 4, Apogeo de la historia en la época colonial, con siete capítulos, Consideraciones generales, Los clásicos de la historia de Cuba, Historia y política, Historia y erudición, Historia y crítica, Historia local y Biografía. Las referencias bibliográficas se agrupan por epígrafes o tópicos, al final de todos y cada uno de los capítulos, agregándose a las mismas opiniones, noticias y comentarios, que no aparecen en el cuerpo de la obra. Al final del trabajo, aparece un Índice alfabético, que abarca todo su contenido. En este índice hemos notado que solamente se incluyen los nombres citados en el texto, excluyéndose los que aparecen en las secciones bibliográficas al final de cada capítulo: ejemplo, Vérez de Peraza, Elena, aparece en al Índice alfabético con la referencia a la página 5, y no se incluye en dicho Índice su mención en la página 29.

Desde la publicación de la *Biblioteca histórica cubana*, por Carlos M. Trelles, tres tomos, Matanzas—Habana, 1922-26, hacía falta un estudio como el presente, para reordenar y valorizar su extenso contenido. No compartimos la opinión de nuestro buen amigo Pérez Cabrera, cuando dice que para evitar "el tratamiento siempre enojoso de los autores que aun viven, hemos conducido nuestro indagación hasta 1898, y nada más;" pues hubiéramos preferido que tuviera

como límite, por lo menos, el mismo de la obra de Trelles. No es exacto además, que limitando la obra hasta 1898, se esquite el comentario de autores vivos. Bueno es advertir, como lo aclara el propio autor, que en algunos casos, en los que el escritor considerado continúa produciendo obras estimables, mencionamos casi siempre esas nuevas realizaciones, pero no profundizamos en su análisis;" lo que ocurre cuando estudia las obras biográficas de Enrique Piñeyro: pp. 356-359, dentro del capítulo séptimo, Biografías, donde echamos de menos algunos repertorios, como la *Habana artística*, por Serafín Ramírez.

Por su estilo claro y erudición profunda, esta nueva obra de Pérez Cabrera, agrega un título importante a la historiografía cubana y de gran utilidad, como fuente de consulta, para profesores y estudiosos de la materia, dentro y fuera de Cuba.

University of Florida

FERMÍN PERAZA

*Derecho territorial ecuatoriano.* By JULIO TOBAR DONOSO and ALFREDO LUNA TOBAR. Quito, 1961. Editorial La Unión Católica. Maps. Pp. 284. Suces 40.—

This text, written for university students, is the best survey of Ecuador's territorial rights published until now. Of course, Jorge Pérez Concha's monumental work is more complete, but it is written more from the point of view of diplomatic relations. Of particular interest in the present work is the section on the 1942 Protocol of Rio de Janeiro, imposed on Ecuador in open violation of the 1933 Montevideo treaty which outlawed conquests: senior author Tobar was Ecuador's chief negotiator at Rio. The Brazilian Oswaldo Aranha emerges as the chief villain. But one is bewildered at the candor with which *ex-canciller* Tobar relates the way in which he allowed himself to be bullied into signing his country's dismemberment.

A few minor remarks: A serious book like this should not reproduce the *chisme* of Tupac Yupanqui's sailing to the Galápagos Islands, based on the single testimony of a *cuzqueño* a century after the event was supposed to have taken place (p. 274). The Cabildo of Quito had no right to speak in the name of the other cities of the District, since these had been subordinated to the Real Audiencia and not to the Ayuntamiento of Quito (p. 257). It is not correct to say, "*por desgracia se empeñó Colombia en sustituir el Chinchipe con el Huancabamba*" (p. 83). The difference is fundamental, for if the border followed the Chinchipe river, Jaén would be left to Peru. Yet, the war of 1828 was fought chiefly for the incorporation
